# Supplementary material for: First-principles view of the interaction between Li and Bi4Ge3O12 anodes
Source: Royal Society of Chemistry journal article supplement (doi:10.1039/d0cp04744a), 2020-01-01
Supplement: d0cp04744a2.pdf [file d0cp04744a2.pdf]

# **First-principles view of the interaction between Li and $\text{Bi}_4\text{Ge}_3\text{O}_{12}$ anode**

HongXian Liu<sup>1</sup>, Jassiel R. Rodriguez<sup>2</sup>, Vilas G. Pol<sup>2</sup>, Yanning Zhang<sup>1\*</sup>

<sup>1</sup>Institute of Fundamental and Frontier Sciences, University of Electronic Science and  
Technology of China, Chengdu 610054, Sichuan, China.

<sup>2</sup>Davidson School of Chemical Engineering, Purdue University, West Lafayette, IN  
47907, USA.

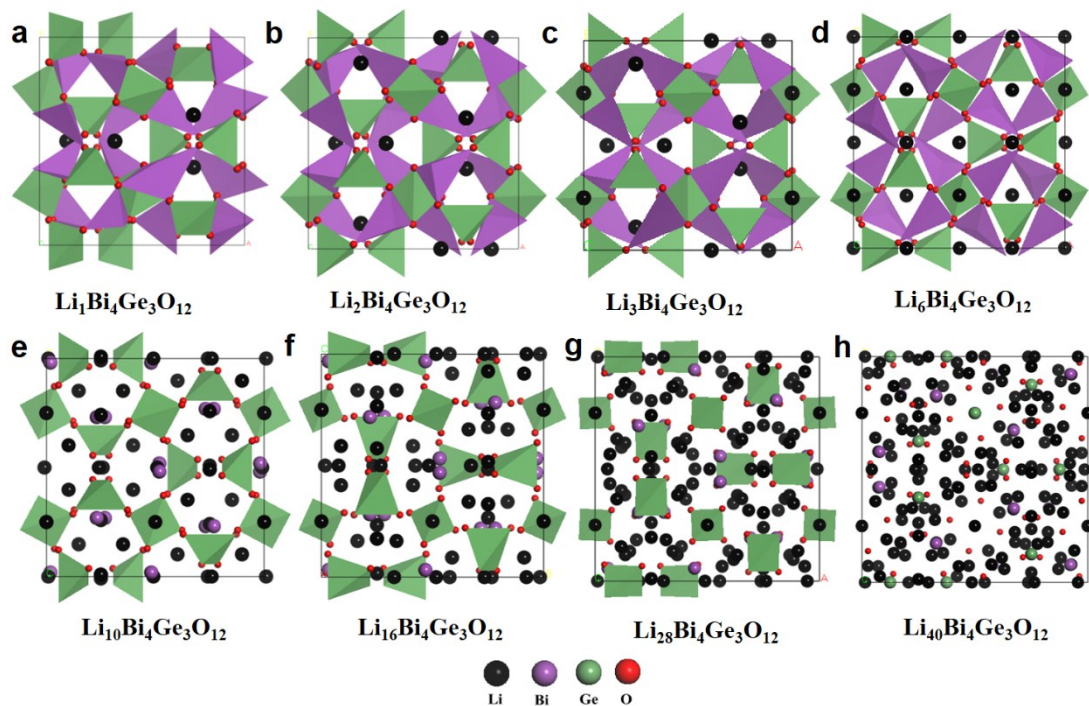

**Figure S1.** The optimized structures of (a) $\text{Li}_1\text{Bi}_4\text{Ge}_3\text{O}_{12}$ , (b) $\text{Li}_2\text{Bi}_4\text{Ge}_3\text{O}_{12}$ , (c) $\text{Li}_3\text{Bi}_4\text{Ge}_3\text{O}_{12}$ , (d) $\text{Li}_6\text{Bi}_4\text{Ge}_3\text{O}_{12}$ , (e) $\text{Li}_{10}\text{Bi}_4\text{Ge}_3\text{O}_{12}$ , (f) $\text{Li}_{16}\text{Bi}_4\text{Ge}_3\text{O}_{12}$ , (g) $\text{Li}_{28}\text{Bi}_4\text{Ge}_3\text{O}_{12}$ , (h) $\text{Li}_{40}\text{Bi}_4\text{Ge}_3\text{O}_{12}$ . The purple, green, red and black balls are for Bi, Ge, O and Li atoms, respectively.

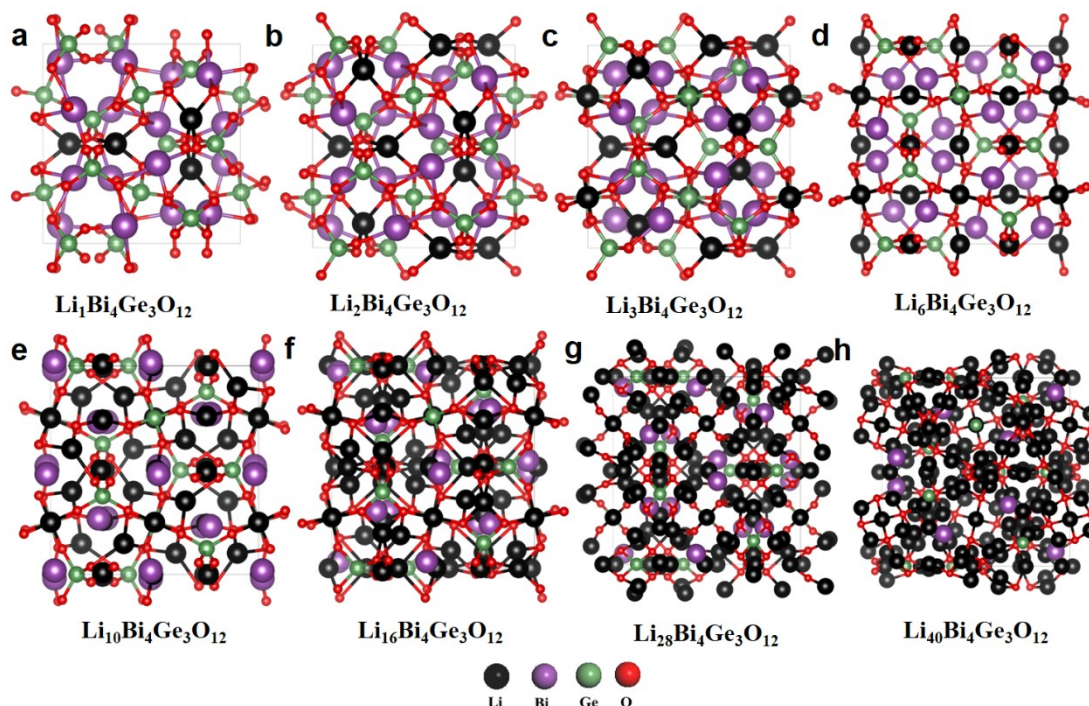

**Figure S2.** The optimized  $\text{Li}_n\text{Bi}_4\text{Ge}_3\text{O}_{12}$  configurations with the coordinates of atoms (a) $\text{Li}_1\text{Bi}_4\text{Ge}_3\text{O}_{12}$ , (b) $\text{Li}_2\text{Bi}_4\text{Ge}_3\text{O}_{12}$ , (c) $\text{Li}_3\text{Bi}_4\text{Ge}_3\text{O}_{12}$ , (d) $\text{Li}_6\text{Bi}_4\text{Ge}_3\text{O}_{12}$ , (e) $\text{Li}_{10}\text{Bi}_4\text{Ge}_3\text{O}_{12}$ , (f) $\text{Li}_{16}\text{Bi}_4\text{Ge}_3\text{O}_{12}$ , (g) $\text{Li}_{28}\text{Bi}_4\text{Ge}_3\text{O}_{12}$ , (h) $\text{Li}_{40}\text{Bi}_4\text{Ge}_3\text{O}_{12}$ . The purple, green, red and black balls are for Bi, Ge, O and Li atoms, respectively.

**Table S1.** The lattice parameters and volume of optimized  $\text{Li}_n\text{Bi}_4\text{Ge}_3\text{O}_{12}$ .

| $\text{Li}_n\text{Bi}_4\text{Ge}_3\text{O}_{12}$ | Lattice ( $\text{\AA}$ ) | Vol ( $\text{\AA}^3$ ) |
|--------------------------------------------------|--------------------------|------------------------|
| bulk                                             | 10.68                    | 1218.66                |
| $\text{Li}_{0.25}$                               | 10.76/10.72/10.72        | 1235.26                |
| $\text{Li}_{0.5}$                                | 10.79/10.79/10.74        | 1250.28                |
| $\text{Li}_{0.75}$                               | 10.83/10.83/10.72        | 1257.96                |
| $\text{Li}_1$                                    | 10.80/10.92/10.74        | 1267.57                |
| $\text{Li}_2$                                    | 11.02/11.02/10.78        | 1310.33                |
| $\text{Li}_3$                                    | 11.06/11.09/11.09        | 1360.29                |
| $\text{Li}_6$                                    | 12.44                    | 1922.67                |
| $\text{Li}_{10}$                                 | 12.35                    | 1882.29                |
| $\text{Li}_{16}$                                 | 12.62                    | 2007.74                |
| $\text{Li}_{28}$                                 | 13.87                    | 2668.94                |
| $\text{Li}_{40}$                                 | 14.73                    | 3195.07                |

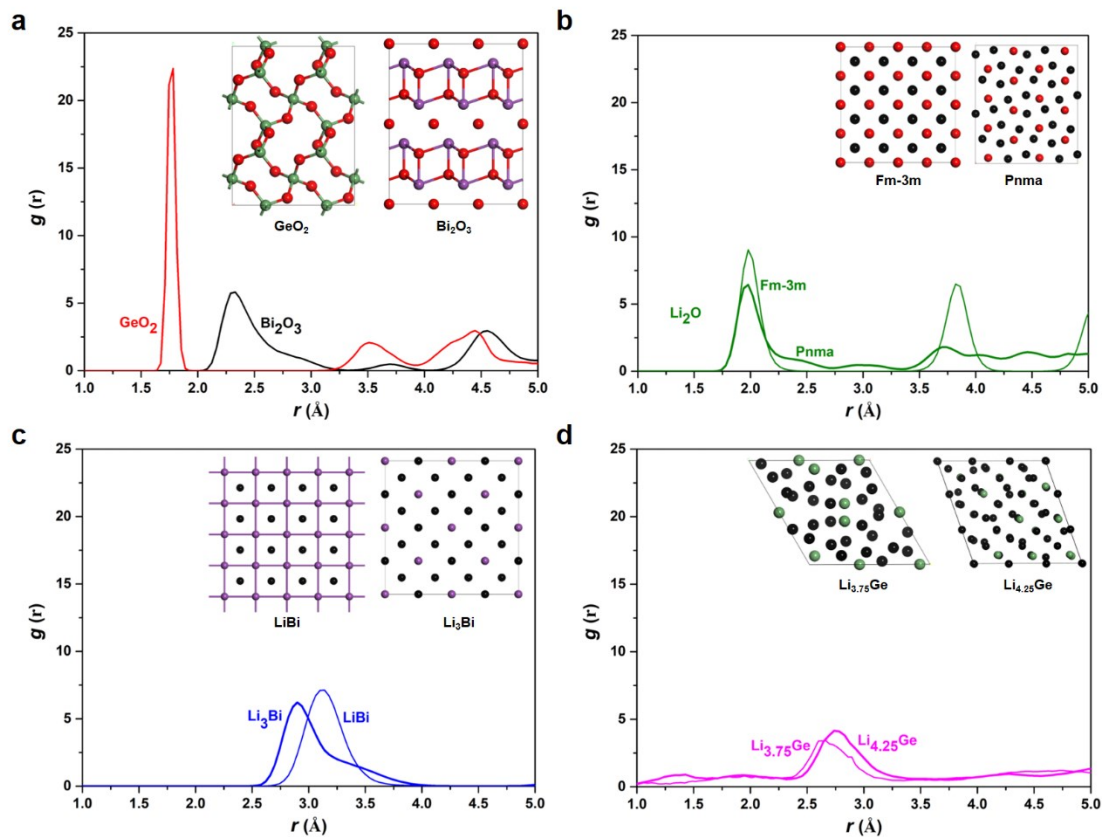

**Figure S3.** The calculated  $g(r)$  curves of (a) $\text{GeO}_2$  and  $\text{Bi}_2\text{O}_3$ , (b) $\text{Li}_2\text{O}$ , (c) $\text{LiBi}$  and  $\text{Li}_3\text{Bi}$  (d) $\text{Li}_{3.75}\text{Ge}$  and  $\text{Li}_{4.25}\text{Ge}$ . The zoom-in diagrams are the crystal structures of lithiation products adopted in MD simulations.

**Table S2.** The detailed information of lithiation products.<sup>1, 2</sup>

| Compounds                        | Crystal            | Formula                           | Energy (eV) |
|----------------------------------|--------------------|-----------------------------------|-------------|
| Li <sub>2</sub> O                | Fm-3m              | Li <sub>2</sub> O                 | -14.348     |
|                                  | Pnma               | Li <sub>8</sub> O <sub>4</sub>    | -56.356     |
| LiBi                             | P4/mmm             | LiBi                              | -6.592      |
| Li <sub>3</sub> Bi               | Fm-3m              | Li <sub>3</sub> Bi                | -11.796     |
| Li <sub>15</sub> Ge <sub>4</sub> | I-43d              | Li <sub>30</sub> Ge <sub>8</sub>  | -106.044    |
| Li <sub>4.25</sub> Ge            | F-43M              | Li <sub>85</sub> Ge <sub>20</sub> | -285.060    |
| Bi <sub>2</sub> O <sub>3</sub>   | P-3m1              | Bi <sub>2</sub> O <sub>3</sub>    | -28.348     |
|                                  | Pn-3m              | Bi <sub>4</sub> O <sub>6</sub>    | -53.754     |
| Li                               | Im-3m              | Li <sub>2</sub>                   | -3.815      |
|                                  | P4 <sub>1</sub> 32 | Li <sub>4</sub>                   | -6.546      |
| Bi                               | Im-3m              | Bi <sub>1</sub>                   | -3.768      |
|                                  | Pmma               | Bi <sub>2</sub>                   | -8.031      |
| Ge                               | Im-3m              | Ge <sub>1</sub>                   | -4.177      |
| GeO <sub>2</sub>                 | P3 <sub>1</sub> 21 | Ge <sub>3</sub> O <sub>6</sub>    | -57.724     |

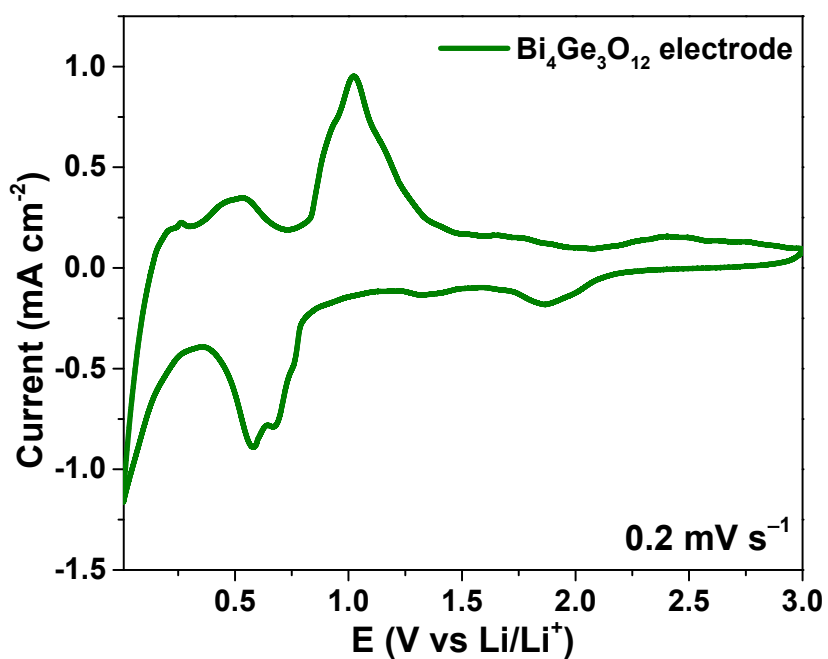

**Figure S4.** Cyclic voltammogram curve of the Bi<sub>4</sub>Ge<sub>3</sub>O<sub>12</sub>-base electrode with 1 M LiPF<sub>6</sub> in EC:DEC.

## References

1. M. de Jong, W. Chen, T. Angsten, A. Jain, R. Notestine, A. Gamst, M. Sluiter, C. Krishna Ande, S. van der Zwaag, J. J. Plata, C. Toher, S. Curtarolo, G. Ceder, K. A. Persson and M. Asta, *Scientific Data*, 2015, **2**, 150009.
2. A. Jain, S. P. Ong, G. Hautier, W. Chen, W. D. Richards, S. Dacek, S. Cholia, D. Gunter, D. Skinner, G. Ceder and K. A. Persson, *APL Materials*, 2013, **1**, 011002.
